# Supplementary material for: Genome-Wide Identification of Key Components of RNA Silencing in Two Phaseolus vulgaris Genotypes of Contrasting Origin and Their Expression Analyses in Response to Fungal Infection
Source: MDPI journal article supplement (doi:10.3390/genes13010064), 2021-12-27
Supplement: s1 [file s1]

**Table S1.** List of primer sequences used in this study.

| Gene name       | Primer name | Primer Sequence (5'-3') | Product length (bp) | Reference  |
|-----------------|-------------|-------------------------|---------------------|------------|
| PvM AGO1        | AGO1_F      | GGCAGACCTTCACCATTT      | 106                 | This study |
|                 | AGO1_R      | TGTAGTAGGGAGTTCACGGA    |                     |            |
| PvM AGO2a       | AGO2_F      | AAGATTCAGGTTACAAGTGCC   | 100                 | This study |
|                 | AGO2_R      | TGGTCCTTCGCATCATTA      |                     |            |
| PvM AGO4a       | AGO4a_2_F:  | ACCACCTGCTATCCCATCAG    | 114                 | This study |
|                 | AGO4a_2_R:  | CGCAACTTCGTCCCTTTAGA    |                     |            |
| PvM AGO4b       | AGO4b_1_F:  | TAGGGAGAAAAGGTGCTCGAA   | 121                 | This study |
|                 | AGO4b_1_R:  | AGACGATTACGGGCAAGAGA    |                     |            |
| PvM AGO4c       | AGO4c_5_F   | GTACGAGGACTTGTGCGTGA    | 75                  | This study |
|                 | AGO4c_5_R   | CACCTCAAACGGCTGCTCTA    |                     |            |
| PvM DCL2a       | DCL2a_F     | TAACACCTGAAACATTGAAGC   | 100                 | This study |
|                 | DCL2a_R     | TCTTTGCGAGATACCACACT    |                     |            |
| PvM DCL2b       | DCL2b_F     | CTGCTCTGTTGTTTATGGACT   | 92                  | This study |
|                 | DCL2b_R     | CAGTTTCTCTGGTTGAATGTC   |                     |            |
| Reference genes |             |                         |                     |            |
| Unknown 1       | Ukn1-F      | ATTCCCATCATGCAGCAAAG    | 192                 | [48]       |
|                 | Ukn1-R      | AGATCCCTCCAGGTCAATCC    |                     |            |
| Unknown 2       | Ukn2-F      | CCAATTCAACCATCCCTCAC    | 153                 | [48]       |
|                 | Ukn2-R      | AAACTCCTCTGCACCCCTCAG   |                     |            |
| Actin-11        | Act11-F     | TGCATACGTTGGTGATGAGG    | 190                 | [48]       |
|                 | Act11-R     | AGCCTTGGGGTTAAGAGGAG    |                     |            |
