# Supplementary figures and images for: Genome-Wide Identification of Key Components of RNA Silencing in Two Phaseolus vulgaris Genotypes of Contrasting Origin and Their Expression Analyses in Response to Fungal Infection
Source: MDPI journal article supplement (doi:10.3390/genes13010064), 2021-12-27

Figure S1

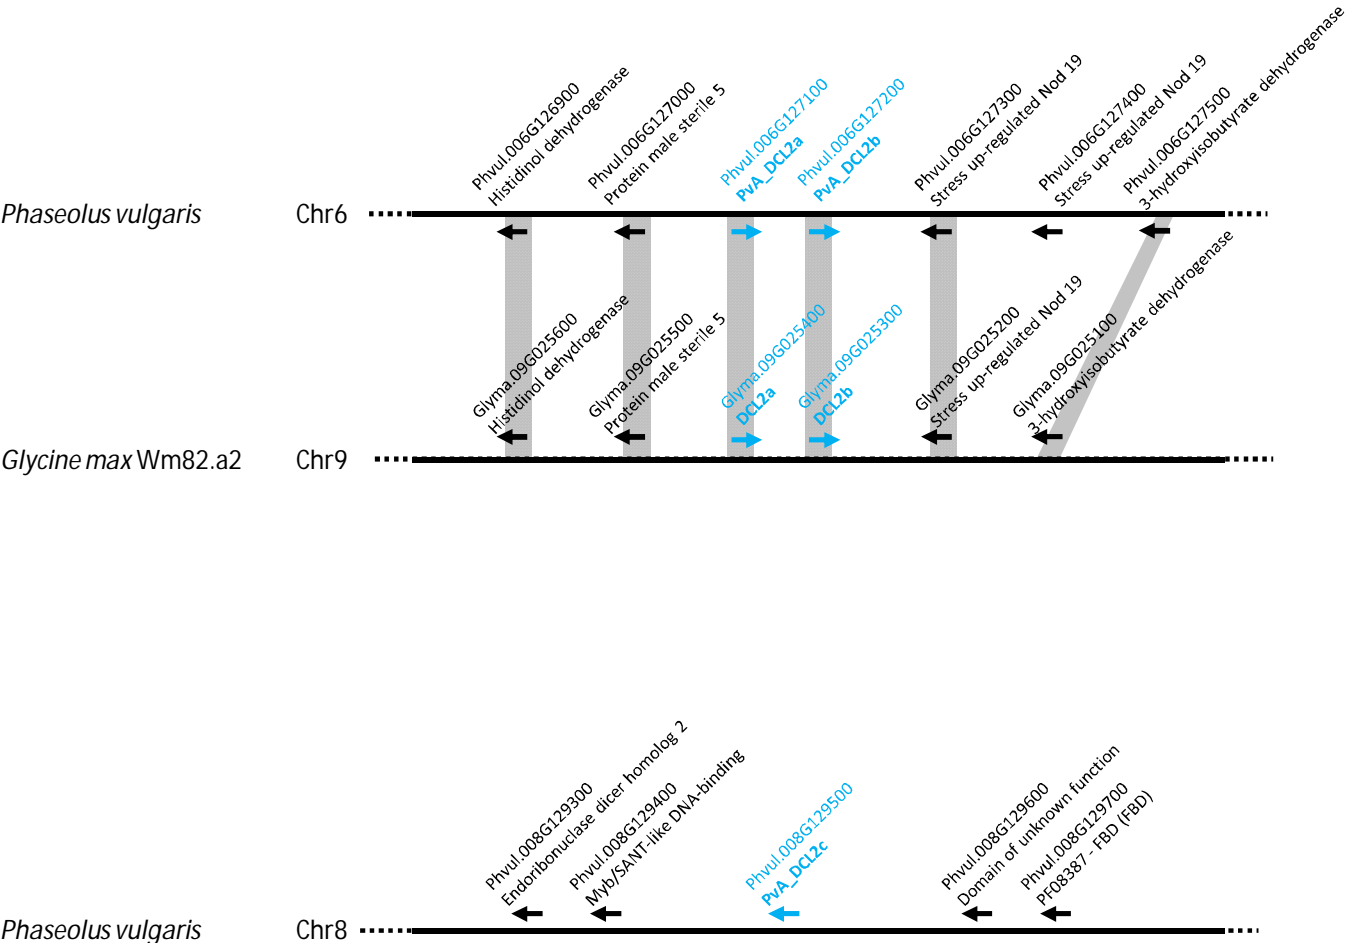

Supplement: s1 [file s1]
